1     **Autologous adipose-derived stem cell transplantation enhances healing of wound**  
2                                   **with exposed bone in a rat model**

3

4                                   **Running title**

5     **Autologous adipose-derived stem cell transplantation enhances wound healing in a**  
6                                   **rat model**

7

8     Tomo Hamada, Hidenori Matsubara\*, Yasuhisa Yoshida, Shuhei Ugaji, Issei Nomura,  
9     Hiroyuki T suchiya

10

11    Department of Orthopaedic Surgery, Graduate School of Medical Sciences, Kanazawa  
12    University, Kanazawa, Japan

13

14    \*Corresponding author

15    E-mail: [seikei@med.kanazawa-u.ac.jp](mailto:seikei@med.kanazawa-u.ac.jp)

16

## 17 **Abstract**

18 **Objectives.** Soft tissue wounds with exposed bone often require extended healing times  
19 and can be associated with severe complications. We describe the ability of artificial  
20 dermis with autogenic adipose-derived stem cells (ADSCs) to promote the healing of  
21 wounds with exposed bone in a rat model.

22 **Methods.** Adipose tissues harvested from the bilateral inguinal regions of Wistar rats  
23 were used as ADSCs. Rats were randomly divided into control and ADSC groups to  
24 investigate the efficacy of ADSC transplantation for wound healing (n=20 per group).  
25 Soft tissue defects were created on the heads of the rats and were covered with artificial  
26 dermis with or without the seeded ADSCs. Specimens from these rats were evaluated  
27 using digital image analysis, histology, immunohistochemistry, cell labeling, and real-  
28 time reverse-transcription polymerase chain reaction (Real-time RT-PCR).

29 **Results.** The average global wound area was significantly smaller in the ADSC group  
30 than in the control group on days 3, 7, and 14 after surgery ( $p<0.05$ ). After 14 days, the  
31 blood vessel density in the wound increased by 1.6-fold in the ADSC group compared  
32 with that in the control group ( $p<0.01$ ). Real-time RT-PCR results showed higher *Fgfb*  
33 and *Vegf* expression levels at all time points, and higher *Tgfb1* and *Tgfb3* expression  
34 levels until 14 days after surgery, in the ADSC group than in the control group  
35 ( $p<0.05$ ).

36 **Conclusions.** In wounds with exposed bone, autogenic ADSCs can promote  
37 vascularization and wound healing. Use of this cell source has multiple benefits,  
38 including convenient clinical application and lack of ethical concerns.

39

40

## 41 **Introduction**

42 Some wounds caused by ulcers, trauma, and various operations, result in exposed bone,  
43 leading to severe complications in many cases during treatment of soft tissue. Currently,  
44 surgical treatment for defects with exposed bone typically involves the use of local or  
45 distal skin flaps, muscle flaps, or myocutaneous flaps. However, there are many risks  
46 associated with wound coverage by these flaps, and a complicated microsurgical  
47 approach is required for successful treatment. Moreover, use of a composite tissue  
48 transfer technique may not be possible in such cases owing to the paucity of the graft  
49 donor site and other factors.

50 Artificial dermis is a commercially available treatment for full-thickness skin defects  
51 after debridement. It has been successfully used to promote healing by creating a  
52 vascular matrix over an exposed bone in clinical reports [1,2]. However, the formation  
53 of neodermal tissue is delayed, thus prolonging the treatment period. A main reason for  
54 prolonging the treatment period is the slow vascularization rate [3]. Several recent  
55 studies have shown that in the context of tissue injury, mesenchymal stem cells (MSCs)  
56 exhibit excellent potential for promoting healing and vascularization of wounds [4,5].  
57 Among the various types of MSCs, adipose-derived stromal stem cells (ADSCs) have  
58 many unique advantages. ADSCs are abundant in the subcutaneous adipose tissue and  
59 can be easily harvested using a syringe or a minimally invasive lipoaspiration  
60 procedure.

61 Our aim was to evaluate the efficacy of autogenic ADSCs with artificial dermis to  
62 promote the healing and vascularization of a wound with exposed bone, which is one of

63 the wounds with the worst healing conditions.

64

## 65 **Methods**

66

### 67 **Animal experiments**

68 All experimental protocols were approved by the Kanazawa University Advanced  
69 Science Research Center (Approval Number: AP-173885). Forty-three female Wistar  
70 rats [age, 8-9 weeks and mean weight, 147.4 g ( $\pm$  9.3 g)] were used in this experiment,  
71 and housed under specific pathogen-free conditions with three rats per cage in a 12-hour  
72 light/dark cycle with ad libitum access to food and water. A schematic overview of the  
73 experimental design is shown in Fig. 1. The rats were anesthetized with an  
74 intraperitoneal injection of pentobarbital (40 mg/kg) and xylazin (15 mg/kg). The  
75 adipose tissues were harvested from the bilateral inguinal region (total yield of  
76 approximately 1.2 g) for use as ADSCs. After one week, 12  $\times$  12-mm<sup>2</sup> circular soft  
77 tissue defects with exposed bone were created on the heads of the rats by removing the  
78 cutaneous tissue and the periosteum of the cranium using a modification of a previously  
79 reported method [6]. After creating the soft tissue defect, all rats were housed with one  
80 rat per cage. The rats were randomly divided into two groups (a control group and an  
81 ADSC group, 20 rats each) to investigate the efficacy of ADSC transplantation for  
82 wound healing. The soft tissue defects were then covered with a 12  $\times$  12-mm<sup>2</sup> circular  
83 artificial dermis with or without the seeded ADSCs. Defects were closed with six  
84 stitches using 5-0 monofilament nylon sutures (Keisei Medical, Tokyo, Japan), and the  
85 extent of wound healing of the defects was observed at 3, 7, 14, and 21 days after

86 surgery (n = 5 at each time point). All rats from each group were euthanized after  
87 tracing the wound area on the photograph taken at the established endpoint. The  
88 specimens from these rats were then evaluated using digital image analysis, histology,  
89 immunohistochemistry, and real-time reverse-transcription-polymerase chain reaction  
90 (RT-PCR). The three remaining rats were used for DiI labeling.

91

92 **Fig. 1. Schematic representation of the experimental procedure for transplanting**  
93 **autogenic ADSCs with an artificial dermis into a rat wound model with exposed**  
94 **bone.** Scale bar: 1 mm.

95

## 96 **Artificial dermis**

97 We used the commercially available artificial dermis Integra (Life Sciences Corp.,  
98 Plainsboro, NJ, USA) for this experiment. Integra is widely used in the clinical  
99 treatment of deep partial-thickness and full-thickness burn wounds [7,8]. In addition, in  
100 clinical settings, Integra has been successfully used to promote healing of wounds with  
101 exposed bone [1,2].

102

## 103 **Isolation of ADSCs**

104 ADSCs were isolated from the bilateral inguinal adipose tissue of the rats following a  
105 modification of a previously reported method [9]. In brief, the adipose tissue was  
106 washed with phosphate-buffered saline (PBS; Fujifilm Wako Pure Chemical  
107 Corporation, Osaka, Japan) and cut into strips. Collagenase (Fujifilm Wako Pure  
108 Chemical Corporation, Osaka, Japan) was dissolved in 20 mL of PBS to a final

109 concentration of 0.1% to digest the adipose tissue for 60 minutes in a 37°C water bath  
110 (the mixture was shaken every 15 minutes during the digestion period). Immediately  
111 after the reaction was completed, 20 mL of Dulbecco's modified Eagle's medium  
112 (DMEM; Fujifilm Wako Pure Chemical Corporation, Osaka, Japan) was added to  
113 neutralize the collagenase activity. The resulting solution was then filtered by a 40- $\mu$ m  
114 cell strainer (Corning Inc., Corning, NY, USA), the filtrate was centrifuged at 700 $\times$ g for  
115 6 minutes at 25°C, and the supernatant was removed. The remaining deposit was added  
116 to DMEM supplemented with 10% fetal bovine serum (FBS; Corning Inc., Corning,  
117 NY, USA) and 1% penicillin/streptomycin (P/S; Fujifilm Wako Pure Chemical  
118 Corporation, Osaka, Japan), plated on a 60.1-cm<sup>2</sup> tissue culture dish (TPP Techno  
119 Plastic Products, Trasadingen, Switzerland), and cultured at 37°C in a 5% CO<sub>2</sub>  
120 incubator. After 24 hours, the debris was removed by washing with PBS, and fresh  
121 medium was added. The ADSCs were selected based on the ability of cells to adhere to  
122 the culture plate. The cells were passaged with 0.25% trypsin-  
123 ethylenediaminetetraacetic acid (Fujifilm Wako Pure Chemical Corporation, Osaka,  
124 Japan) on day 3 and transferred to a new dish. Cells were used at the third passage in all  
125 experiments. Kato et al. [10] proved that these cells have MSC-like self-renewal,  
126 adipogenesis, and osteogenesis properties.

127

## 128 **ADSC seeding**

129 Integra was placed with the silicone side positioned downward. In this scaffold, 1.0  $\times$   
130 10<sup>6</sup> ADSCs/mL were seeded drop-wise with 40  $\mu$ L of DMEM supplemented with 10%  
131 FBS and 1% P/S according to the fluid capacity of the scaffold. The scaffold of the

132 control group was placed in a separate tissue culture dish with the same culture medium  
133 but without ADSCs. All dishes were incubated at 37°C with 5% CO<sub>2</sub>. After 24 hours,  
134 just prior to transplanting, the debris was removed by washing with PBS, and fresh  
135 medium was added.

136

## 137 **Wound area**

138 On the day of surgery and at the established endpoints (3, 7, 14, and 21 days after  
139 surgery), the wound area was measured by tracing the wound margin on the photograph  
140 followed by calculation of the pixel data using ImageJ software (National Institutes of  
141 Health, Bethesda, MD, USA). The global wound area (%) was calculated according to  
142 the residual wound area on a given day (tx) relative to the wound area measured on the  
143 day of surgery, as follows:

$$144 \quad \text{Global wound area} = \frac{[\text{tx wound area}]}{[\text{original wound area}]} \times 100$$

145

## 146 **Histological analysis of paraffin-embedded tissues**

147 At the established endpoints (3, 7, 14, and 21 days after surgery), the wounds were  
148 harvested with approximately 5-mm margins and the cranial bone attached (n = 5 at  
149 each time point). A part (right quarter) of the wound was used for subsequent real-time  
150 RT-PCR analysis. The remaining part of the wound was fixed in 10% neutralized  
151 formalin solution and dehydrated using an ethanol gradient (70%, 80%, 90%, and  
152 100%). The fixed specimens were decalcified in 10% formic sodium citrate solution,  
153 embedded in paraffin, and sectioned in the coronal plane. The sections were stained  
154 with hematoxylin and eosin and Masson's trichrome, and the slides were observed using

155 an optical microscope (Bioevo BZ-9000; Keyence Co., Osaka, Japan).

156

## 157 **Immunohistochemistry**

158 Tissue samples were embedded in paraffin and sectioned in the coronal plane, and the  
159 blood vessel density was analyzed immunohistochemically (n = 5 at 14 days after  
160 surgery per group). Blood vessel endothelial cells were immunohistochemically stained  
161 with an anti-CD31 antibody (Abcam, Cambridge, Britain, ab28364, 1:50). The sections  
162 were incubated in Liberate Antibody Binding Solution (LAB solution; Polysciences,  
163 Philadelphia, PA, USA) at room temperature for 15 minutes, and then Protein Block  
164 Serum-Free (Dako, Glostrup, Denmark) and phosphate buffer containing hydrogen  
165 peroxide (Peroxidase-Blocking Solution, Dako, Glostrup, Denmark) were added to the  
166 sections for 10 minutes each for blocking. Primary anti-CD31 antibody in Tris-HCl  
167 buffer containing stabilizing protein and 0.015 mol/L sodium azide (Dako Antibody  
168 Diluent, Dako, Glostrup, Denmark) were then added to the slides, which were incubated  
169 at 4°C overnight. After addition of the secondary antibody, Dako REAL™  
170 EnVision™/HRP, Rabbit/Mouse (ENV, Dako, Glostrup, Denmark), the slides were  
171 further incubated for 30 minutes at room temperature. The samples were developed with  
172 DAB chromogen (Dako REAL™ DAB+ Chromogen, Dako, Glostrup, Denmark) and  
173 the substrate and observed under the microscope. Once the desired signal-to-noise ratio  
174 was achieved, the reaction was stopped by washing the slides in deionized water. To  
175 quantify vascularization within the wound, the blood vessel densities of five animals in  
176 each group at 14 days after surgery were determined by measuring the vascular area in  
177 the wound area of the specimen.



178 The blood vessel densities were quantified at the established endpoints in the  
179 immunohistochemically stained samples. Quantification was performed in five  
180 randomly selected high-power fields of five non-consecutive tissue sections per wound  
181 within each group [11]. Only vessels with a diameter < 50  $\mu\text{m}$  [12] were considered for  
182 this analysis. In this study, it was inevitable that the collagen of the artificial dermis  
183 would become stained with an anti-CD31 antibody. Therefore, we excluded this area for  
184 measurement of the vascular area. The vessel area in the selected field of each specimen  
185 was observed with a fluorescence microscope (U-RFL-T; Olympus, Tokyo, Japan), and  
186 the images were analyzed with ImageJ software (National Institutes of Health,  
187 Bethesda, MD, USA). The percentage of the relative area of CD31-positive vessels was  
188 calculated using ImageJ software from the following equation for each time point (tx):

$$189 \quad \text{Blood vessel density(\%)} = \frac{[\text{tx area of CD31 positive vessels}]}{[\text{total field area}]} \times 100$$

190

## 191 **DiI labeling**

192 To confirm survival potential and location of the transplanted ADSCs, the ADSCs were  
193 labeled with the fluorescent dye DiI (Vybrant® DiI Cell Labeling Solution; Life  
194 Technologies, Carlsbad, CA, USA) prior to transplantation. DiI binds to cellular thiols  
195 and has long-term stability, which enables the tracing of DiI-labeled transplanted cells  
196 in the host tissue. This experiment involved a separate group of rats (n = 3). The  
197 concentration of ADSCs was adjusted to  $1.0 \times 10^6$  cells/mL, and 5  $\mu\text{L}/\text{mL}$  of DiI was  
198 dissolved in this medium and incubated for 15 minutes at 37°C in a 5% CO<sub>2</sub> incubator  
199 for ADSC labeling. After the reaction was completed, the filtrate was centrifuged at  
200 1000 rpm for 5 minutes at 25°C, and the supernatant was removed. Once the DiI was

201 completely removed from the filtrate, ADSCs were centrifuged twice with DMEM  
202 under the same setting, and the supernatant was removed. DiI-labeled ADSCs were  
203 seeded to the Integra scaffold and transplanted as described above. At day 21 after  
204 transplantation of the labeled ADSCs, a frozen section was prepared using Kawamoto's  
205 film method [13] in the coronal plane. The survival of the transplanted cells was then  
206 determined in the unstained samples.

207

## 208 **Real-time RT-PCR**

209 RNA was extracted from the granulation tissue of the rats using a NucleoSpin® RNA II  
210 kit (Takara Bio, Otsu, Japan). Each sample was harvested from the right quarter of a  
211 wound with approximately 5-mm margins without the cranial bone, and was disrupted  
212 and homogenized using a syringe (n = 5 at each time point per group). The absorbance  
213 of the resulting total RNA concentrations was determined on an ultraviolet-visible  
214 spectrophotometer with absorbance read at 260/280 nm (NanoDrop Lite; Thermo  
215 Scientific, Waltham, MA, USA). For real-time RT-PCR, 6 µg of mRNA was reverse-  
216 transcribed with RevertAid First-Strand cDNA Synthesis Kit (Thermo Scientific, USA)  
217 using a thermal cycler (T100™ Thermal Cycler; Bio-Rad, Hercules, CA, USA). Real-  
218 time RT-PCR was then carried out on an ABI Prism 7900 apparatus (Applied  
219 Biosystems, Foster City, CA, USA) using Sybr Green PCR Master Mix (Applied  
220 Biosystems, Foster City, CA, USA) per the manufacturer's instructions. Primers for rat  
221 glyceraldehyde-3-phosphate dehydrogenase (*Gapdh*), basic fibroblast growth factor  
222 (*Fgfb*), vascular endothelial growth factor (*Vegf*), transforming growth factor beta 1  
223 (*Tgfb1*), and beta 3 (*Tgfb3*) were purchased from Hokkaido System Science Co., Ltd.

224 Japan; the sequences are listed in Table 1. The amplification parameters were an initial  
225 95°C incubation step for 15 minutes, followed by 20 amplification cycles of 94°C for 15  
226 seconds, 60°C for 30 seconds, and 72°C for 30 seconds. The reactions ended with a  
227 72°C extension step for 7 minutes, followed by storage at 4°C overnight. The  
228 expression levels of each target gene were calculated relative to the level of *Gapdh* for  
229 each sample.

230

231 **Table 1. Sequences of primers used in real-time RT-PCR amplification.**

| Primer                   | Sequence (5'–3')        | Amplicon size<br>(bp) |
|--------------------------|-------------------------|-----------------------|
| rat <i>Gapdh</i> forward | TGCACCACCAACTGCTTA      | 18                    |
| rat <i>Gapdh</i> reverse | GGATGCAGGGATGATGTTC     | 19                    |
| rat <i>Fgfb</i> forward  | GCGACCCACACGTCAAATA     | 20                    |
| rat <i>Fgfb</i> reverse  | CAGCCGTCCATCTTCCTTCA    | 20                    |
| rat <i>Vegf</i> forward  | AAATCCTGGAGCGTTCACCTGTG | 22                    |
| rat <i>Vegf</i> reverse  | AACGCGAGTCTGTGTTTTTGC   | 21                    |
| rat <i>Tgfb1</i> forward | GACCGCAACAACGCAATCTA    | 20                    |
| rat <i>Tgfb1</i> reverse | CACTGCTTCCCGAATGTCTGA   | 21                    |
| rat <i>Tgfb3</i> forward | TACTGCTTCCGCAACTTGGA    | 20                    |
| rat <i>Tgfb3</i> reverse | AGGTTCGTGGACCCATTCC     | 20                    |

232

## 233 **Statistical analysis**

234 All statistical analyses were performed using the Statistical Package for Social Sciences  
235 version 23.0 (SPSS, Inc., Chicago, IL, USA). All results are presented as the mean ±  
236 standard deviation (SD). The data were normally distributed; comparisons between two  
237 groups (i.e., control vs. ADSCs) in the global wound area, the percentage of the relative  
238 area of CD31-positive vessels, and relative gene expression levels were performed using  
239 Student's *t*-test;  $p < 0.05$  was considered statistically significant.

240

## 241 **Results**

242

### 243 **Global wound area**

244 Digital photographs were obtained immediately following surgery and at 3, 7, 14, and  
245 21 days after surgery (Fig. 2a). The average global wound area was significantly smaller  
246 in the ADSC group than in the control group on days 3, 7, and 14 after surgery (Fig.  
247 2b). However, there was no significant difference between the two groups at day 21  
248 because the wounds in almost all the rats were completely cured at that point (Fig. 2b).

249

250 **Fig. 2. Images of wounds with exposed bone and comparison of healing with and**  
251 **without ADSC transplantation.** (a) Macroscopic images of the wound with exposed  
252 bone. Scale bar: 1 mm. (b) Measurement and analysis of the wound area with or without  
253 ADSC transplantation. The data represent the mean  $\pm$  SD.\* $p < 0.05$ .

254

### 255 **Histology**

256 In magnified microphotographs of sagittal sections of hematoxylin and eosin-stained  
257 specimens collected 3 days after surgery (Fig. 3a, b), inflammatory cells, mainly  
258 neutrophils, as well as red blood cells were observed within the collagen sponges in  
259 both groups. The number of cells was higher in the ADSC group than in the control  
260 group. Seven days after the surgery (Fig. 3c, d), fibroblasts were observed in the  
261 collagen sponges with slight vascularization, and the fibroblast numbers and tissues

262 density were higher in the ADSC group than in the control group. Fourteen days after  
263 the surgery (Fig. 3e, f), a thick and dense dermal layer was observed in both groups. At  
264 21 days after the surgery (Fig. 3g, h), most of the wounds showed epithelization both  
265 macroscopically and histologically.

266 In Masson's trichrome-stained sections, especially at 7 and 14 days (Fig. 4c–f),  
267 higher-density granulation tissue was noted for the ADSC groups. In addition, the  
268 wounds of the ADSC groups showed greater tissue thickness and more homogeneous  
269 granulation tissue than those of the control groups at all time points (Fig. 4).

270

271 **Fig. 3. Representative magnified images (100x) of hematoxylin and eosin-stained**  
272 **histological sections of the center of the wound along with implantation time.**

273 Histological sections at day 3, 7, 14, and 21 highlight the wound healing progression  
274 along the experimental time frame. Scale bars indicate 100  $\mu\text{m}$  for all panels.

275

276 **Fig. 4. Representative magnified images (100x) of Masson's trichrome-stained**  
277 **histological sections of the center of the wound along with implantation time.**

278 Histological sections at day 3, 7, 14, and 21 highlight the wound healing progression  
279 along the experimental time frame. Scale bars indicate 100  $\mu\text{m}$  for all panels.

280

## 281 **Immunohistochemistry**

282 The blood vessel density was quantified 14 days after surgery. The extent of  
283 neovascularization in the injured tissues was evaluated by immunostaining detection of  
284 CD31-expressing endothelial cells in paraffin-embedded tissue samples sectioned in the

285 coronal plane (Fig. 5a~d). The blood vessel density in the wound was increased by 1.6-  
286 fold in the ADSC group compared with that in the control group after 14 days,  
287 representing a statistically significant difference ( $p < 0.01$ ) (Fig. 5e).

288

289 **Fig. 5. Quantitative analysis of wound neovascularization.** (a~d) Control and ADSC  
290 specimens at 14 days after surgery were stained for CD31, a blood vessel endothelial  
291 cell marker (brown) (a, c: 40x magnification. Scale bars = 1 mm). For each group, the  
292 figure below is a micrograph of higher-magnification images of the boxed regions in the  
293 figure above (b, d: 400x magnification. Scale bars = 100  $\mu$ m). (e) Blood vessel density  
294 was calculated by dividing the area of CD31-positive vessels by the total area. The data  
295 represent the mean  $\pm$  SD. HS = healthy skin; GT = granulation tissue; B = cranial bone.

296

## 297 **DiI labeling**

298 Magnified micrographs of sagittal sections of hematoxylin and eosin-stained specimens  
299 that were collected from the ADSC group 21 days after surgery are shown in Fig. 6a.

300 Histologically, most wounds showed epithelization, and high-density granulation and  
301 homogeneous tissue were noted under the epithelization. For identification of tissues  
302 using DiI labeling, the gray scale values of the DiI-labeled section were used (Fig. 6b).

303 In the DiI-labeled section, at 21 days after surgery, numerous DiI-positive (red) cells  
304 were distributed throughout the granulation tissue (Fig. 6c, d).

305

306 **Fig. 6. Representative images of DiI labeling of the center of the wound along with**  
307 **implantation time.** Frozen sections were prepared at 21 days after transplantation of

308 ADSCs labeled with DiI dye. (a) Magnified microphotographs of sagittal sections of  
309 hematoxylin and eosin-stained specimens collected from the ADSC group 21 days after  
310 surgery. (b) Grayscale values of frozen sections of each tissue (40× magnification);  
311 these values were similar to those for the frozen section in (c). Scale bar, 1 mm. (c)  
312 Frozen section with DiI labeling (40× magnification. Scale bar, 1 mm). (d) high-  
313 magnification image (500×) of the boxed region in (c). Scale bar, 100 μm. HS = healthy  
314 skin; GT = granulation tissue; B = cranial bone.

315

## 316 **Real-time RT-PCR**

317 The ability of the transplanted ADSCs to promote neovascularization at the molecular  
318 level was assessed based on the expression of *Fgfb* and *Vegf* using real-time RT-PCR.  
319 Significantly higher expression levels of both genes were detected at all time points for  
320 the ADSC group than for the control group ( $p < 0.05$ ) (Fig. 7).

321 Moreover, the expression levels of *Tgfb1* and *Tgfb3* were examined to determine the  
322 potential biomechanical effect of ADSCs that could affect extracellular matrix  
323 deposition, organization, and scarring. Significantly higher expression levels of both  
324 genes were detected in the ADSC group until 14 days after surgery than in the control  
325 group (Fig. 7).

326

327 **Fig. 7. Relative expression levels of *Fgfb*, *Vegf*, *Tgfb1*, and *Tgfb3* among the**  
328 **different groups at different time points of implantation determined using real-**  
329 **time RT-PCR.** The data represent the mean ± SD. \* $p < 0.05$ , \*\* $p < 0.01$ .

330

## 331 **Discussion**

332 This study is the first report, to our knowledge, of using autogenic ADSCs with  
333 artificial dermis to heal wounds with exposed bone. The regeneration and introduction  
334 of capillaries inside the wound are important to wound healing because tissue  
335 regeneration commonly requires blood flow to supply oxygen and nutrition and remove  
336 waste. However, wounds with exposed bone are strongly deficient in terms of blood  
337 flow. In this study, we demonstrated that ADSCs increased the blood vessel density.  
338 Data from many studies have indicated that ADSCs exhibit improved and more rapid  
339 treatment effects in ischemic wounds such as burn wounds [14,15], radiation ulcers  
340 [16], or diabetic wounds [10,17]. Consistent with these previous findings, we showed  
341 that the wound area decreased significantly earlier when ADSCs were applied to  
342 wounds with exposed bone. The increased blood vessel density resulting from ADSCs  
343 at the ischemic wound site may help promote wound healing in cases with exposed  
344 bone.

345 The contributions of ADSCs to the complex wound-repair processes, which comprises  
346 inflammation, granulation, and remodeling, have been documented [18,19]. ADSCs  
347 have the potential to differentiate into several cell types (including endothelial cells),  
348 secrete angiogenic and anti-apoptotic factors [20,21], and exhibit various advantageous  
349 properties (such as paracrine activity and angiogenic potential) [22,23]. By DiI labeling,  
350 we showed the continued presence of ADSCs in granulation tissue up to 21 days post-  
351 transplantation in wounds with exposed bone. The results might not be sufficient to  
352 state that ADSCs directly differentiated into endothelial cells because we could not  
353 clearly check the form, nature, or detailed locations of the DiI-positive (red) cells.



354 However, numerous DiI-positive (red) cells were distributed throughout the granulation  
355 tissue (Fig. 4c). This result suggests that ADSCs might differentiate into other cell  
356 types, such as fibroblasts or blood vessel endothelial cells. Moreover, in terms of  
357 paracrine activity and angiogenic potential, the significantly higher expression levels of  
358 *Fgfb* and *Vegf* in the ADSC group than in the control group elicited improved  
359 neovascularization in the ADSC group. *Fgfb* and *Vegf* are known to play important  
360 roles during wound healing and can be secreted by ADSCs, thus influencing  
361 neovascularization [24,25]. In a previous study, significantly higher expression of *Fgfb*  
362 and *Vegf* were detected for a group with ADSCs added to a full-thickness excisional  
363 wound [26].

364 In full-thickness excisional wounds (without exposed bone), ADSCs exhibited  
365 increased *Tgfb3* expression, thereby decreasing the scar size and facilitating better  
366 collagen organization, scar pliability, and a more mature collagen arrangement [25,27].  
367 Further, Zonari et al. [26] reported that the use of artificial dermis with ADSCs reduced  
368 *Tgfb1* expression in full-thickness excisional wounds. *Tgfb3* was previously found to  
369 promote normal collagen organization [25,28]. However, *Tgfb1* overexpression resulted  
370 in excessive fibroblast migration, myofibroblast differentiation, and scar formation [29].  
371 In this study, significantly higher expression levels of both *Tgfb1* and *Tgfb3* were  
372 observed in the ADSC group than in the control group. We believe that, in wounds with  
373 exposed bone, higher expression levels of both *Tgfb1* and *Tgfb3* are preferable for  
374 covering the bone surface. Our data demonstrated that ADSCs exhibited increased  
375 expression of both *Tgfb1* and *Tgfb3* in wounds with exposed bone and promoted both  
376 scar formation and normal collagen organization for covering the bone surface.

377 The main limitation of this study is that wound-healing mechanisms are different

378 between humans and rodents. Humans display re-epithelialization and granulation tissue  
379 formation-based wound healing, whereas rats or mice exhibit contraction-based wound  
380 healing. Therefore, in a rodent model of full-thickness excisional wound of the back,  
381 some studies use silicone rings around the wound to reduce contraction upon wounding,  
382 thus allowing a system more representative of human wound healing [18,30]. However,  
383 in our model, using silicone rings is difficult; moreover, they result in serious stress to  
384 the model. In this study, artificial dermis was placed on a wound and fixed with nylon  
385 threads to reduce wound contraction and prevent wound enlargement as a result of the  
386 loose skin of the rats.

## 387 **Conclusions**

388 In this study, to facilitate clinical application, we used ADSCs that were simply  
389 seeded drop-wise with a medium, along with the artificial dermis Integra that is  
390 commonly used as a scaffold. Further, in this study, we used autogenic ADSCs that  
391 have several important advantages regarding the convenience of their clinical  
392 application and fewer ethical concerns compared with those for allogeneic or  
393 xenogeneic ADSCs. Although a potential limitation to the translational use of ADSCs in  
394 patients is the enzymatic isolation technique used, we think that this technology is  
395 highly clinically translatable since both ADSCs and artificial dermis are relatively easy  
396 to obtain. Our study represents the first report that an existing artificial dermis can  
397 maintain autogenetic ADSCs, which can promote the vascularization capacity and  
398 enhance wound healing in a wound with exposed bone.

## 399 **Acknowledgments**

400 We thank Ms. Yoko Kasai for her skillful technical assistance in the  
401 immunohistochemical analysis of paraffin-embedded tissues.

402

## 403 **References**

404 1) Lee LF, Porch JV, Spenler W, Garner WL. Integra in lower extremity reconstruction  
405 after burn injury. *Plast Reconstr Surg* 2008;121(4): 1256-1262.

406 2) Molnar JA, DeFranzo AJ, Hadaegh A, Morykwas MJ, Shen P, Argenta LC.  
407 Acceleration of Integra incorporation in complex tissue defects with subatmospheric  
408 pressure. *Plast Reconstr Surg* 2004;113(5): 1339-1346.

409 3) Jones I, Currie L, Martin R. A guide to biological skin substitutes. *Br J Plast Surg*  
410 2002;55(3): 185-193.

411 4) Murphy MB, Moncivais K, Caplan AI. Mesenchymal stem cells: environmentally  
412 responsive therapeutics for regenerative medicine. *Exp Mol Med* 2013;45: e54.

413 5) Teng M, Huang Y, Zhang H. Application of stems cells in wound healing—an  
414 update. *Wound Repair Regen* 2014;22(2): 151-160.

415 6) Koga Y, Komuro Y, Yamato M, Sueyoshi N, Kojima Y, Okano T, et al. Recovery  
416 course of full-thickness skin defects with exposed bone: an evaluation by a quantitative  
417 examination of new blood vessels. *J Surg Res* 2007;137(1): 30-37.

- 418 7) Blackwood KA, McKean R, Canton I, Freeman CO, Franklin KL, Cole D, et al.  
419 Development of biodegradable electrospun scaffolds for dermal replacement.  
420 *Biomaterials* 2008;29(21): 3091-3104.
- 421 8) Van der Veen VC, van der Wal MB, van Leeuwen MC, Ulrich MM, Middelkoop E.  
422 Biological background of dermal substitutes. *Burns* 2010;36(3): 305-321.
- 423 9) Watanabe N, Ohashi K, Tatsumi K, Utoh R, Shim IK, Kanegae K, et al. Genetically  
424 modified adipose tissue-derived stem/stromal cells, using simian immunodeficiency  
425 virus-based lentiviral vectors, in the treatment of hemophilia B. *Hum Gene Ther*  
426 2013;24(3): 283-294.
- 427 10) Kato Y, Iwata T, Morikawa S, Yamato M, Okano T, Uchigata Y. Allogeneic  
428 transplantation of an adipose-derived stem cell sheet combined with artificial skin  
429 accelerates wound healing in a rat wound model of Type 2 diabetes and obesity.  
430 *Diabetes* 2015;64(8): 2723-2734.
- 431 11) Cerqueira MT, da Silva LP, Santos TC, Pirraco RP, Correlo VM, Reis RL, et al.  
432 Gellan gum-hyaluronic acid spongy-like hydrogels and cells from adipose tissue  
433 synergize promoting neoskin vascularization. *ACS Appl Mater Interfaces* 2014;6(22):  
434 19668-19679.
- 435 12) Liu S, Zhang H, Zhang X, Lu W, Huang X, Xie H, et al. Synergistic angiogenesis

- 436 promoting effects of extracellular matrix scaffolds and adipose-derived stem cells  
437 during wound repair. *Tissue Eng Part A* 2011;17(5-6): 725-739.
- 438 13) Kawamoto T, Shimizu M. A method for preparing 2- to 50-micron-thick fresh-  
439 frozen sections of large samples and undecalcified hard tissues. *Histochem Cell Biol*  
440 2000;113(5): 331-339.
- 441 14) Chen YW, Scutaru TT, Ghetu N, Carasevici E, Lupascu CD, Ferariu D, et al. The  
442 effects of adipose-derived stem cell-differentiated adipocytes on skin burn wound  
443 healing in rats. *J Burn Care Res* 2017;38(1): 1-10.
- 444 15) Loder S, Peterson JR, Agarwal S, Eboda O, Brownley C, DeLaRosa S, et al. Wound  
445 healing after thermal injury is improved by fat and adipose-derived stem cell isografts. *J*  
446 *Burn Care Res* 2015;36(1): 70-76.
- 447 16) Huang SP, Huang CH, Shyu JF, Lee HS, Chen SG, Chan JY, et al. Promotion of  
448 wound healing using adipose-derived stem cells in radiation ulcer of a rat model. *J*  
449 *Biomed Sci* 2013;20: 51.
- 450 17) Nambu M, Kishimoto S, Nakamura S, Mizuno H, Yanagibayashi S, Yamamoto N,  
451 et al. Accelerated wound healing in healing-impaired db/db mice by autologous adipose  
452 tissue-derived stromal cells combined with atelocollagen matrix. *Ann Plast Surg*  
453 2009;62(3): 317-321.

- 454 18) Martin PM, Maux A, Laterreur V, Mayrand D, Gagné VL, Moulin VJ, et al.  
455 Enhancing repair of full-thickness excisional wounds in a murine model: Impact of  
456 tissue-engineered biological dressings featuring human differentiated adipocytes. *Acta*  
457 *Biomater* 2015;22: 39-49.
- 458 19) Broughton G, Janis JE, Attinger CE. The basic science of wound healing. *Plast*  
459 *Reconstr Surg* 2006;117(7 Suppl): 12S-34S.
- 460 20) Rehman J, Traktuev D, Li J, Merfeld-Clauss S, Temm-Grove CJ, Bovenkerk JE, et  
461 al. Secretion of angiogenic and antiapoptotic factors by human adipose stromal cells.  
462 *Circulation* 2004;109(10): 1292-1298.
- 463 21) Schäffler A, Büchler C. Concise review: adipose tissue-derived stromal cells—basic  
464 and clinical implications for novel cell-based therapies. *Stem Cells* 2007;25(4): 818-  
465 827.
- 466 22) Casteilla L, Planat-Benard V, Laharrague P, Cousin B. Adipose-derived stromal  
467 cells: Their identity and uses in clinical trials, an update. *World J Stem Cells* 2011; 3(4):  
468 25-33.
- 469 23) Kern S, Eichler H, Stoeve J, Klüter H, Bieback K. Comparative analysis of  
470 mesenchymal stem cells from bone marrow, umbilical cord blood, or adipose tissue.  
471 *Stem Cells* 2006;24(5): 1294-1301.

- 472 24) Rustad KC, Wong VW, Sorkin M, Glotzbach JP, Major MR, Rajadas J, et al.  
473 Enhancement of mesenchymal stem cell angiogenic capacity and stemness by a  
474 biomimetic hydrogel scaffold. *Biomaterials* 2012;33: 80-90.
- 475 25) Zografou A, Papadopoulos O, Tsigris C, Kavantzas N, Michalopoulos E,  
476 Chatzistamatiou T, et al. Autologous transplantation of adipose-derived stem cells  
477 enhances skin graft survival and wound healing in diabetic rats. *Ann Plast Surg*  
478 2013;71: 225-32.
- 479 26) Zonari A, Martins TM, Paula AC, Boeloni JN, Novikoff S, Marques AP, et al.  
480 Polyhydroxybutyrate-co-hydroxyvalerate structures loaded with adipose stem cells  
481 promote skin healing with reduced scarring. *Acta Biomater* 2015;17: 170-181.
- 482 27) Yun IS, Jeon YR, Lee WJ, Lee JW, Rah DK, Tark KC, et al. Effect of human  
483 adipose derived stem cells on scar formation and remodeling in a pig model: a pilot  
484 study. *Dermatol Surg* 2012;38: 1678-1688.
- 485 28) Li WY, Huang EY, Dudas M, Kaartinen V, Warburton D, Tuan TL. Transforming  
486 growth factor-beta3 affects plasminogen activator inhibitor-1 expression in fetal mice  
487 and modulates fibroblast-mediated collagen gel contraction. *Wound Repair Regen*  
488 2006;14: 516-525.
- 489 29) Chalmers RL. The evidence for the role of transforming growth factor-beta in

490 the formation of abnormal scarring. *Int Wound J* 2011;8: 218-223.

491 30) Lin YC, Grahovac T, Oh SJ, Ieraci M, Rubin JP, Marra KG. Evaluation of a multi-

492 layer adipose-derived stem cell sheet in a full-thickness wound healing model. *Acta*

493 *Biomater* 2013;9(2): 5243-5250.



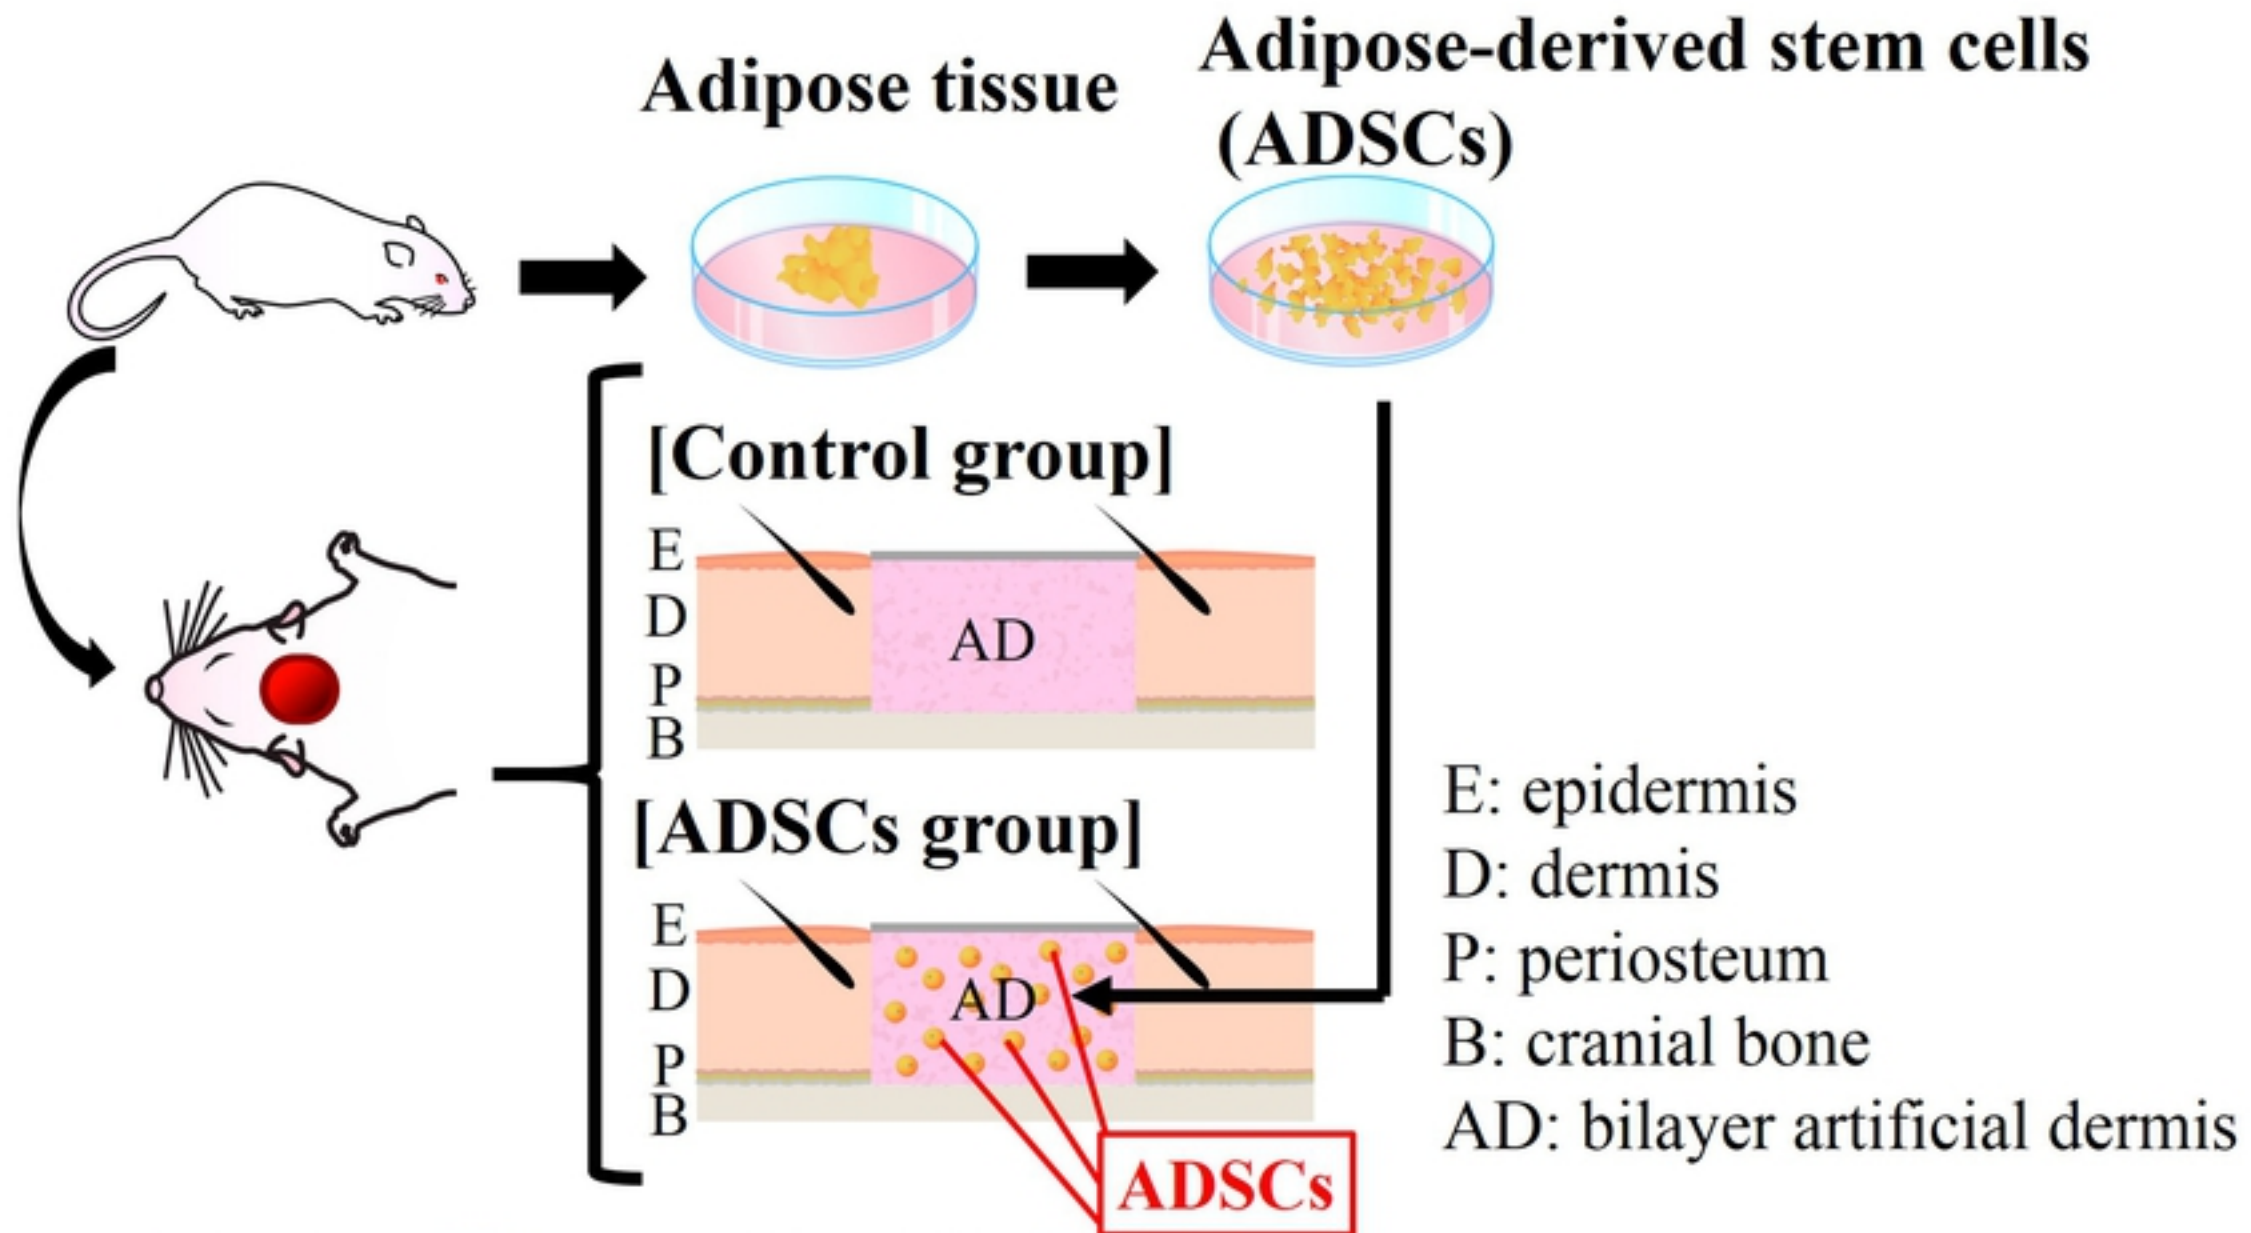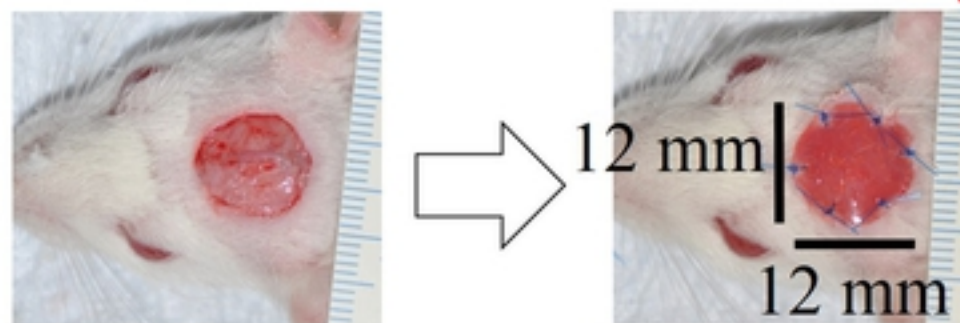

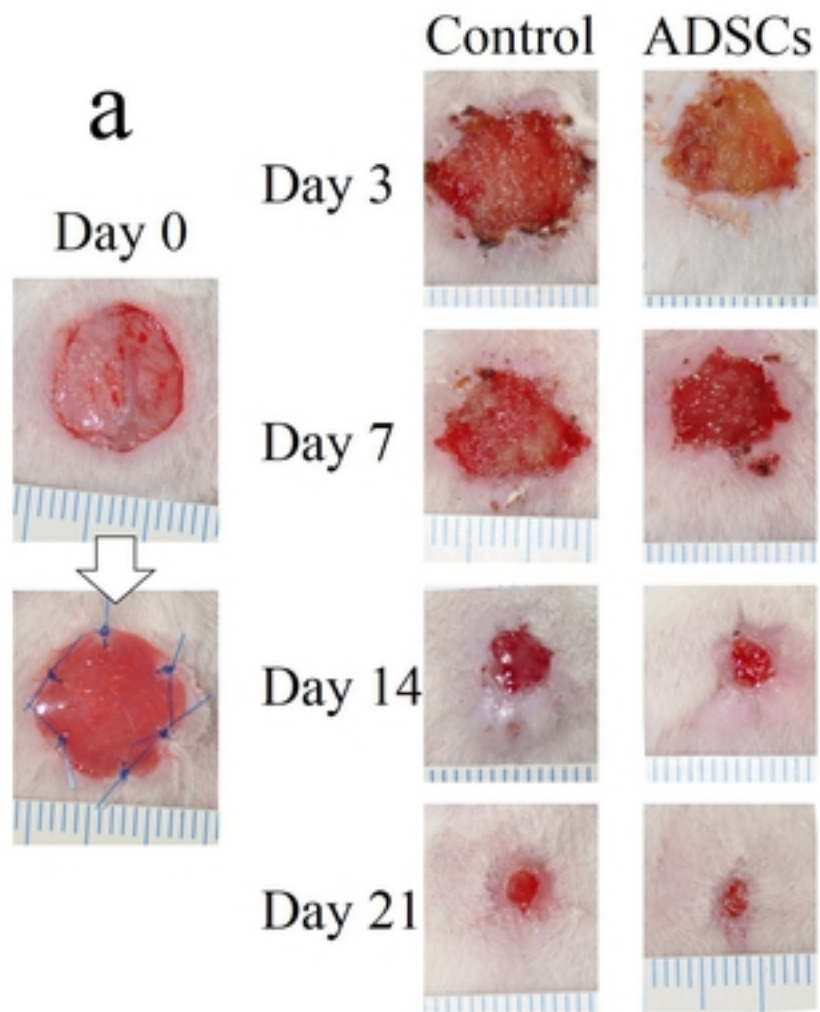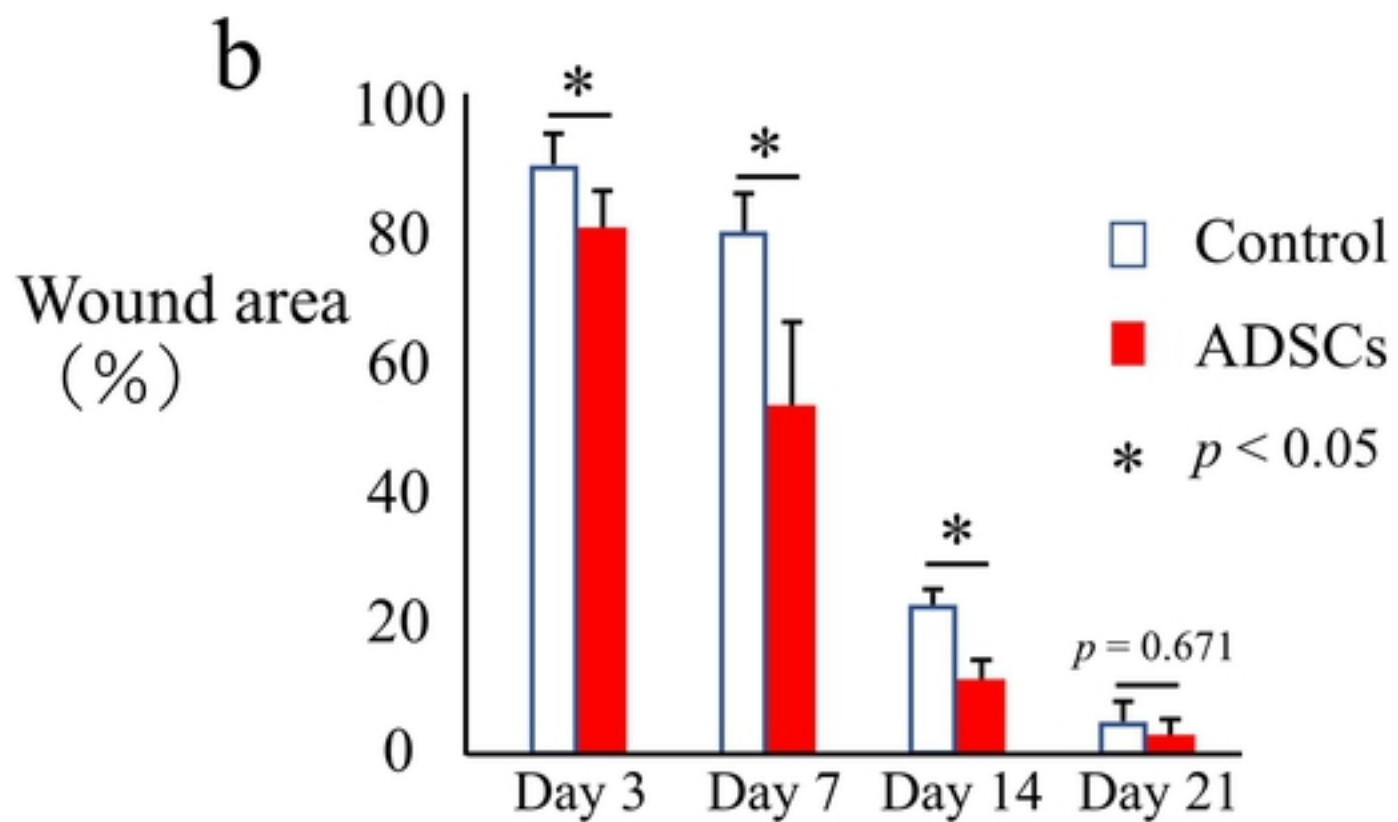

Day 3

Day 7

Day 14

Day 21

a

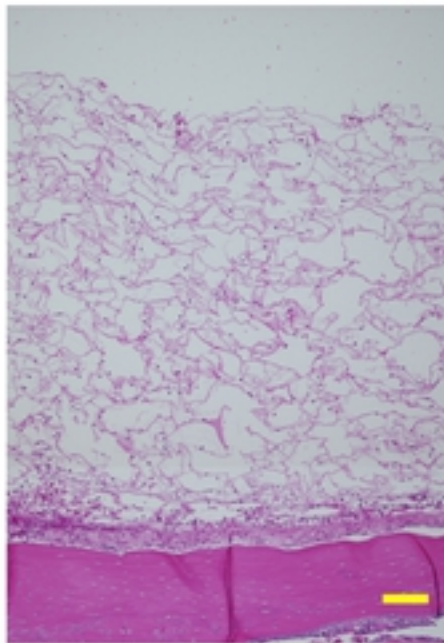

c

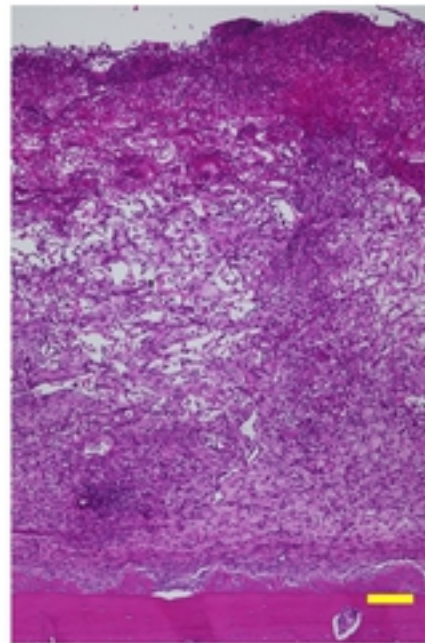

e

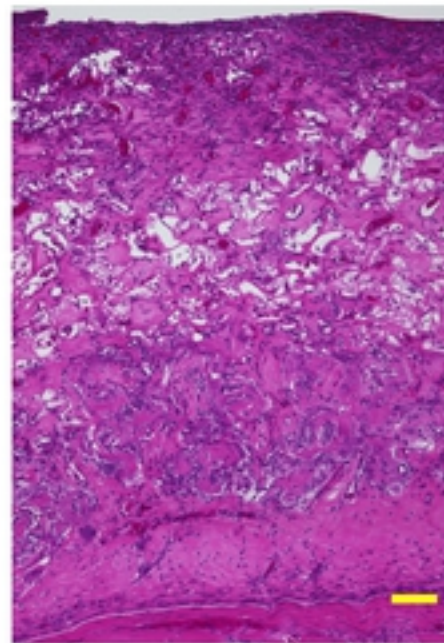

g

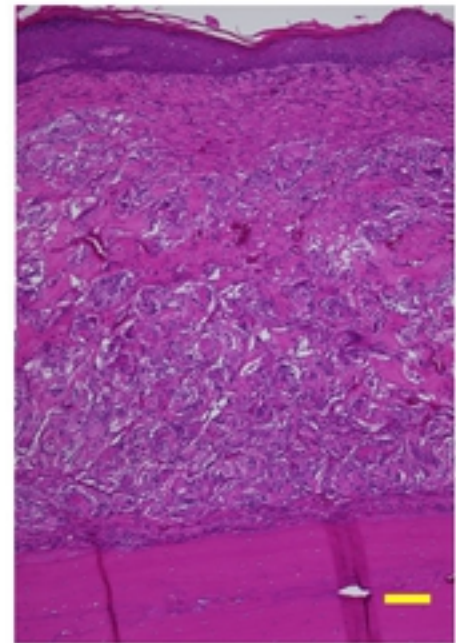

Control

Bone [

b

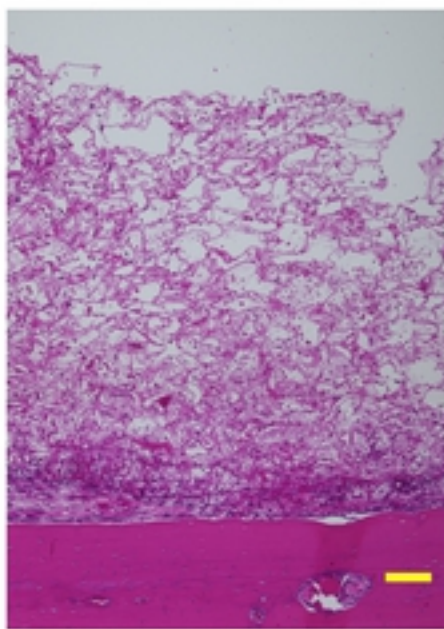

d

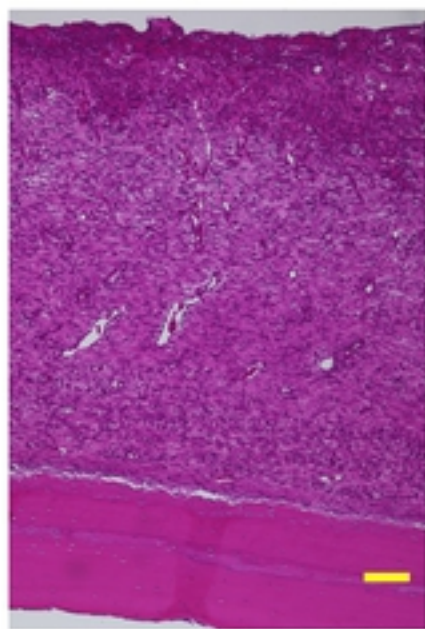

f

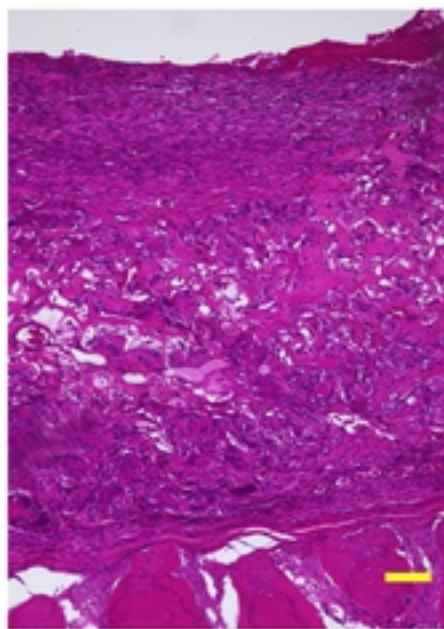

h

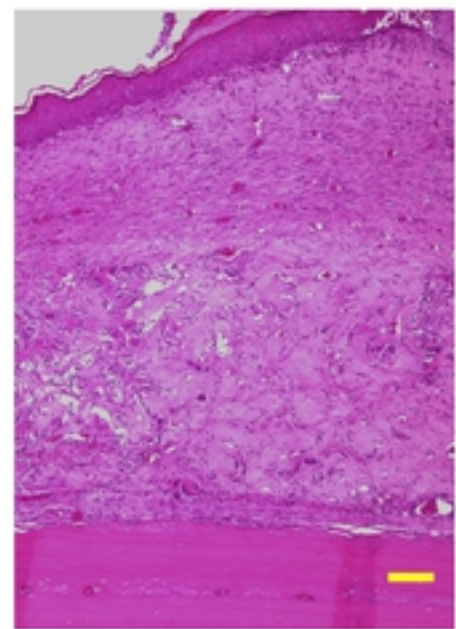

ADSCs

Day 3

Day 7

Day 14

Day 21

a

c

e

g

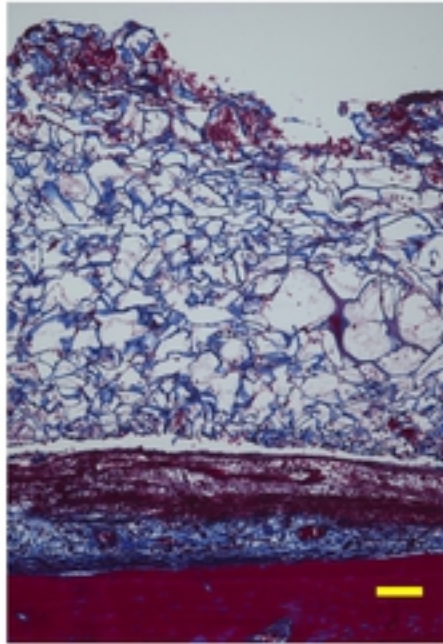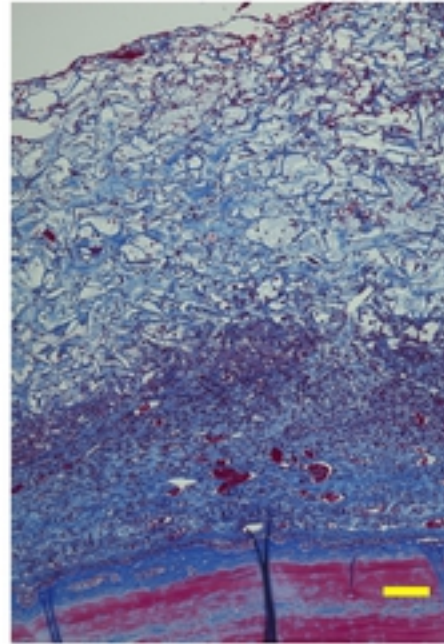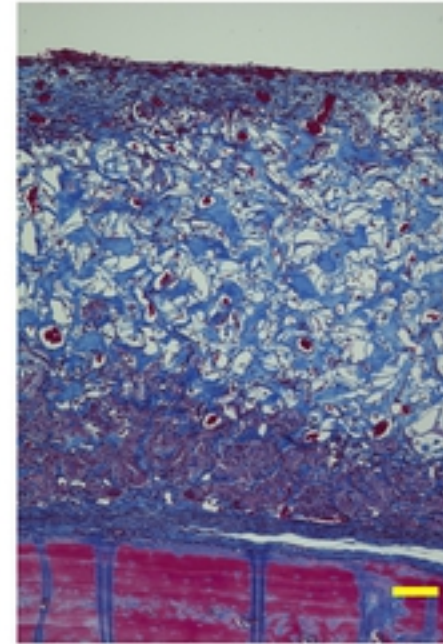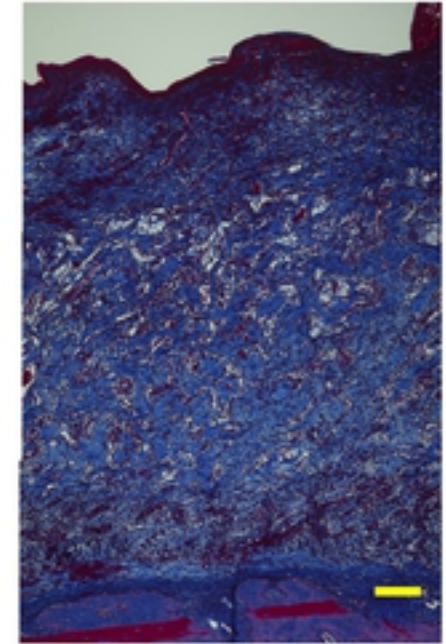

Control

Bone [

b

d

f

h

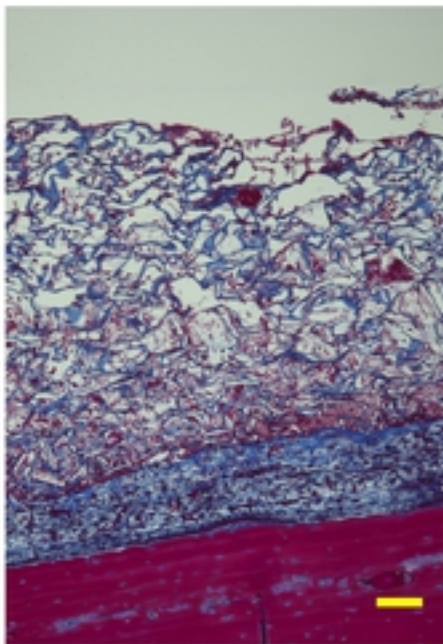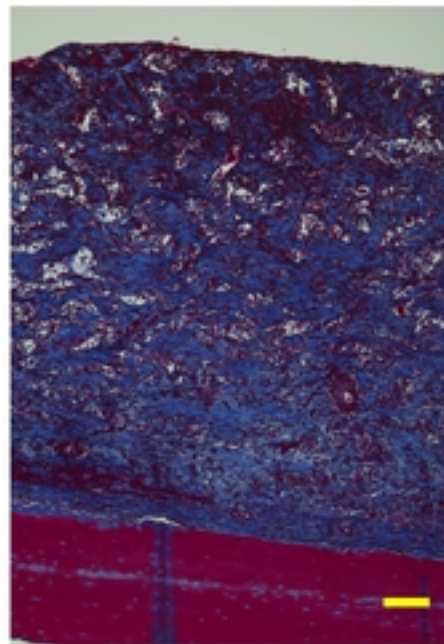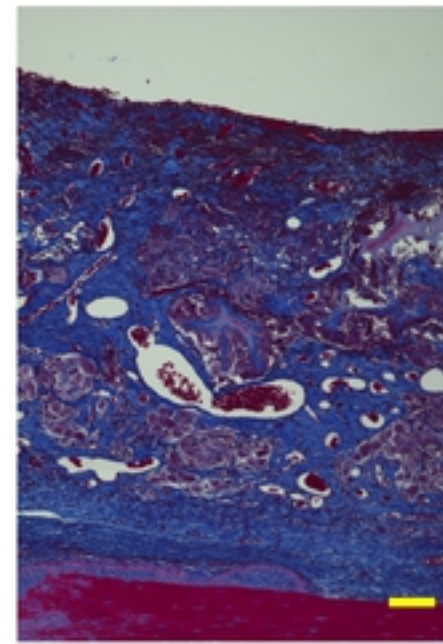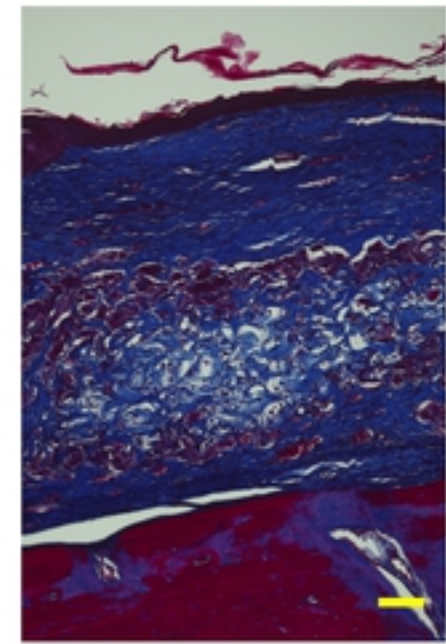

ADSCs

# Control

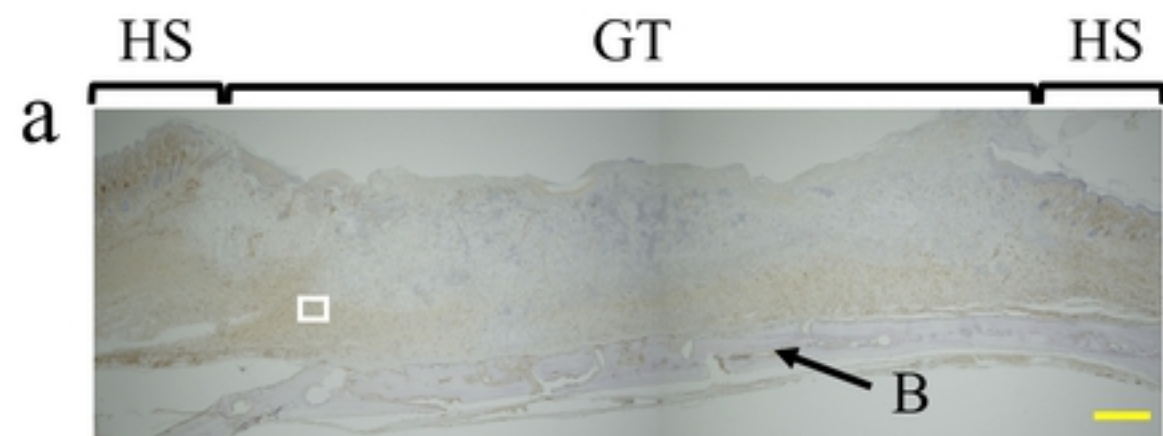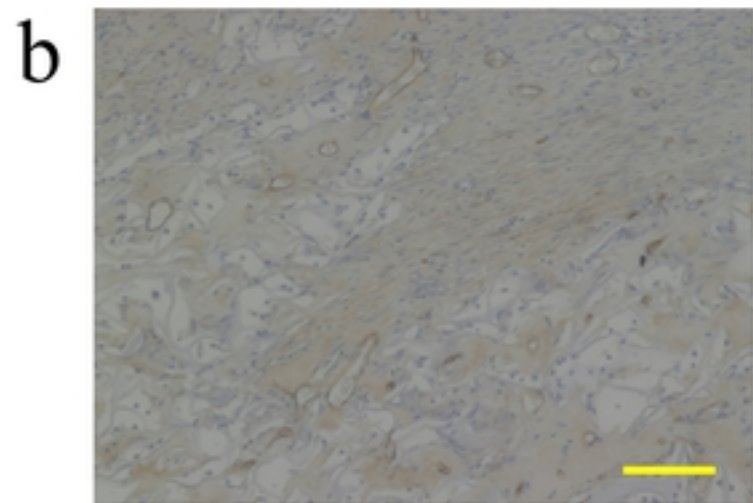

# ADSCs

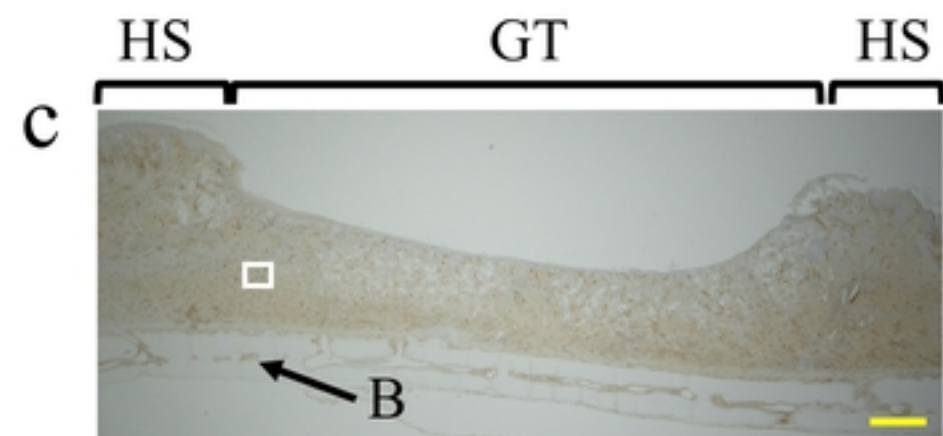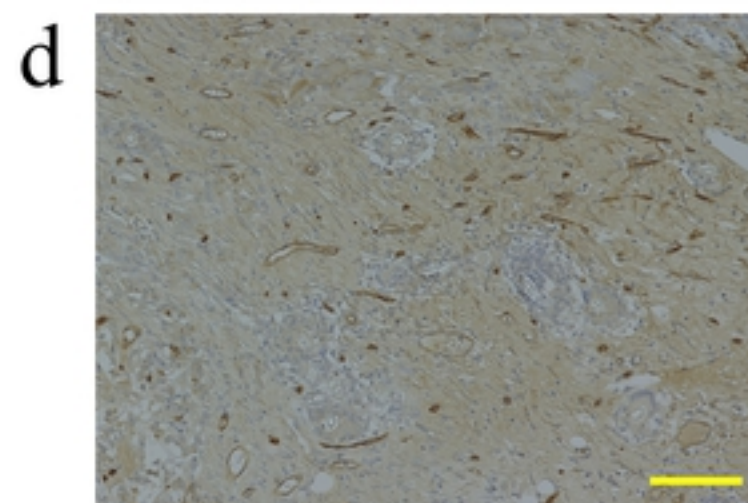

e

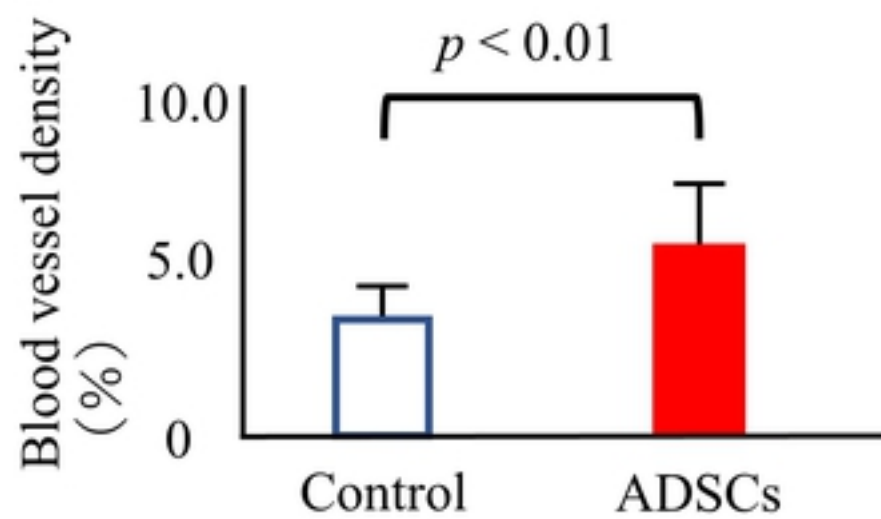

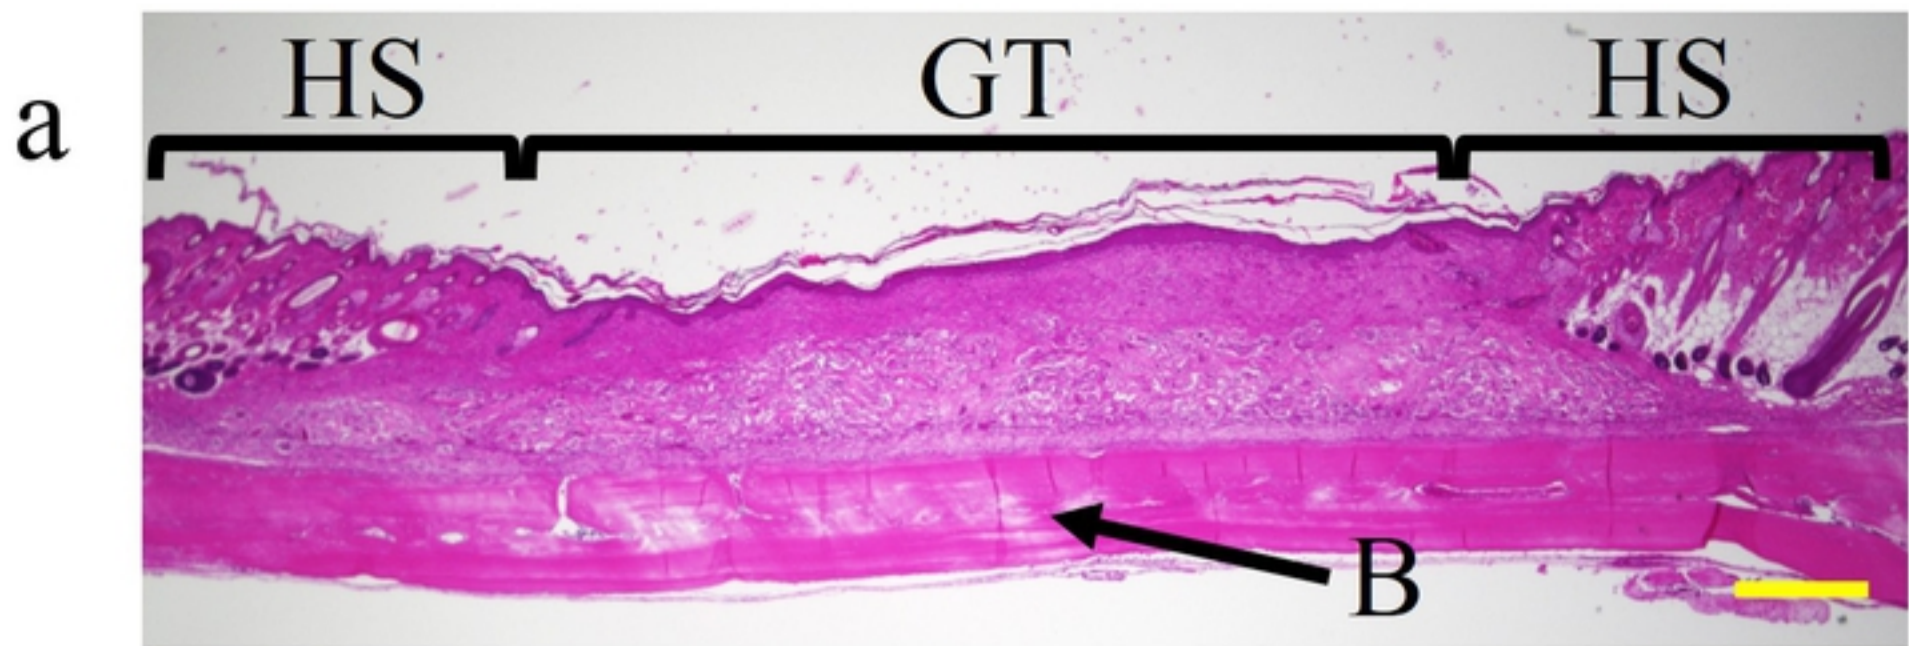

bioRxiv preprint doi: <https://doi.org/10.1101/571968>; this version posted March 8, 2019. The copyright holder for this preprint (which was not certified by peer review) is the author/funder, who has granted bioRxiv a license to display the preprint in perpetuity. It is made available under aCC-BY 4.0 International license.

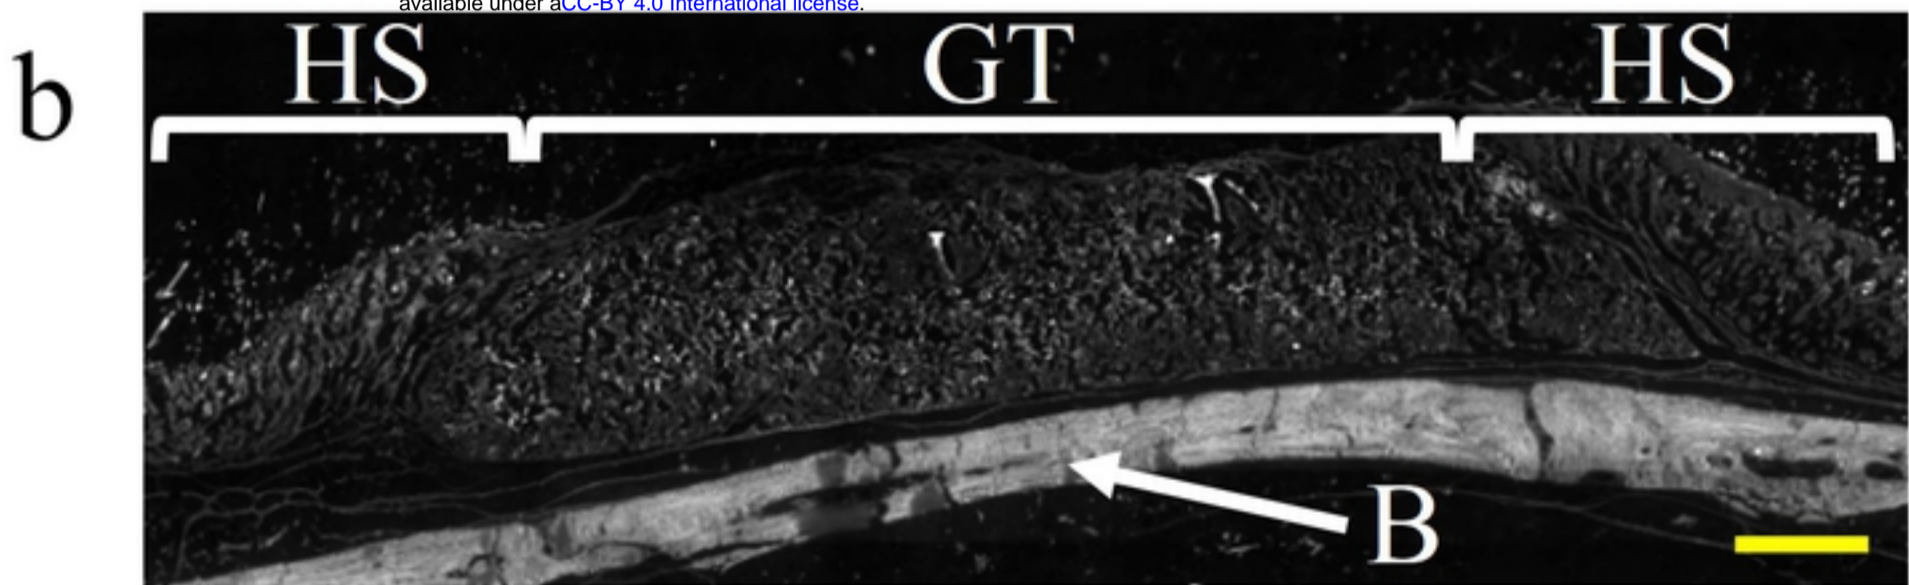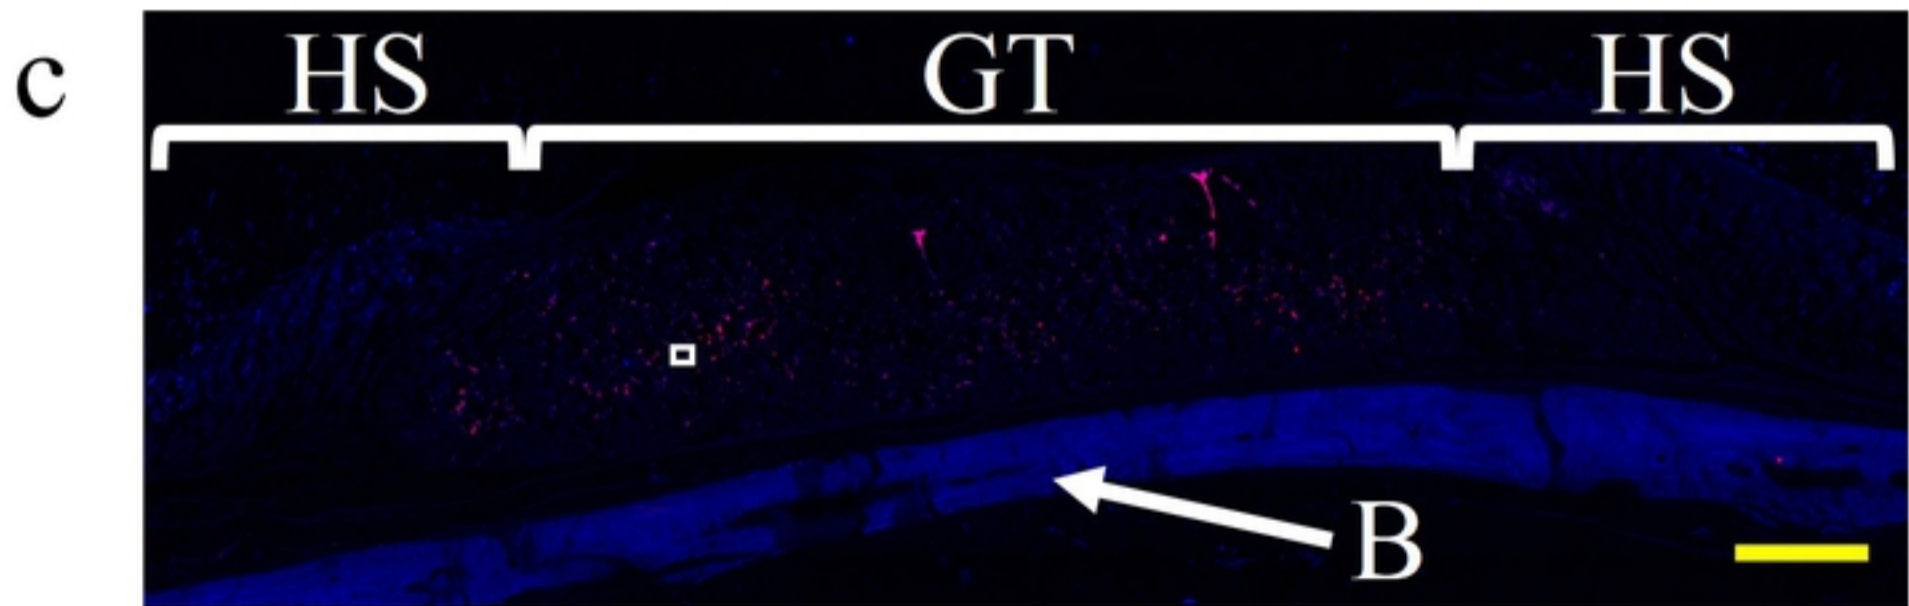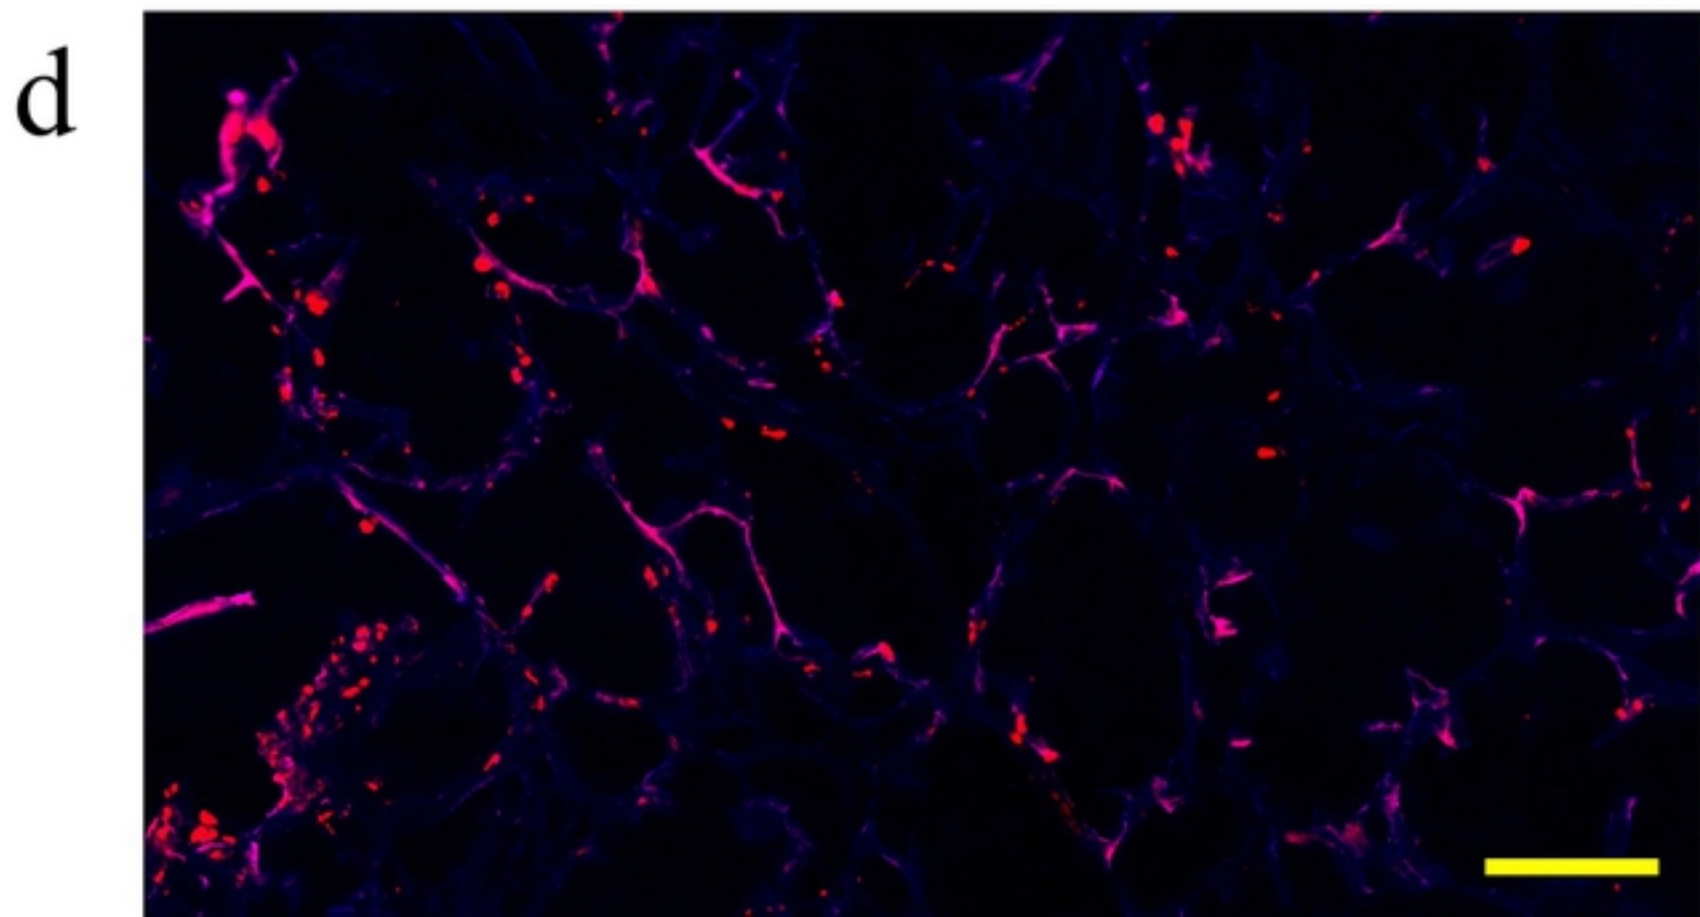

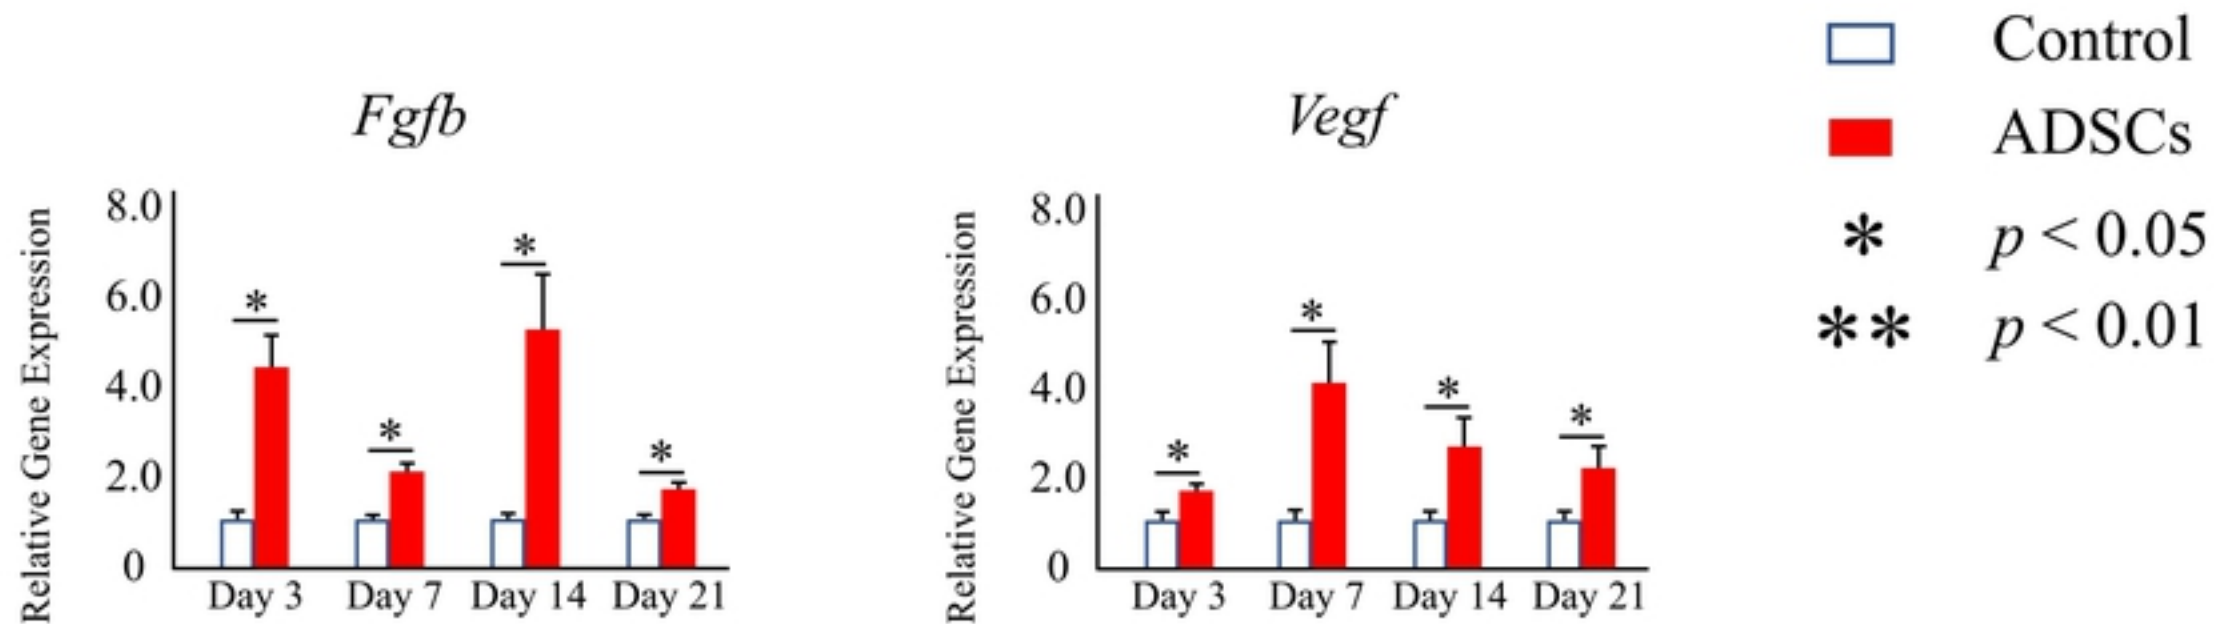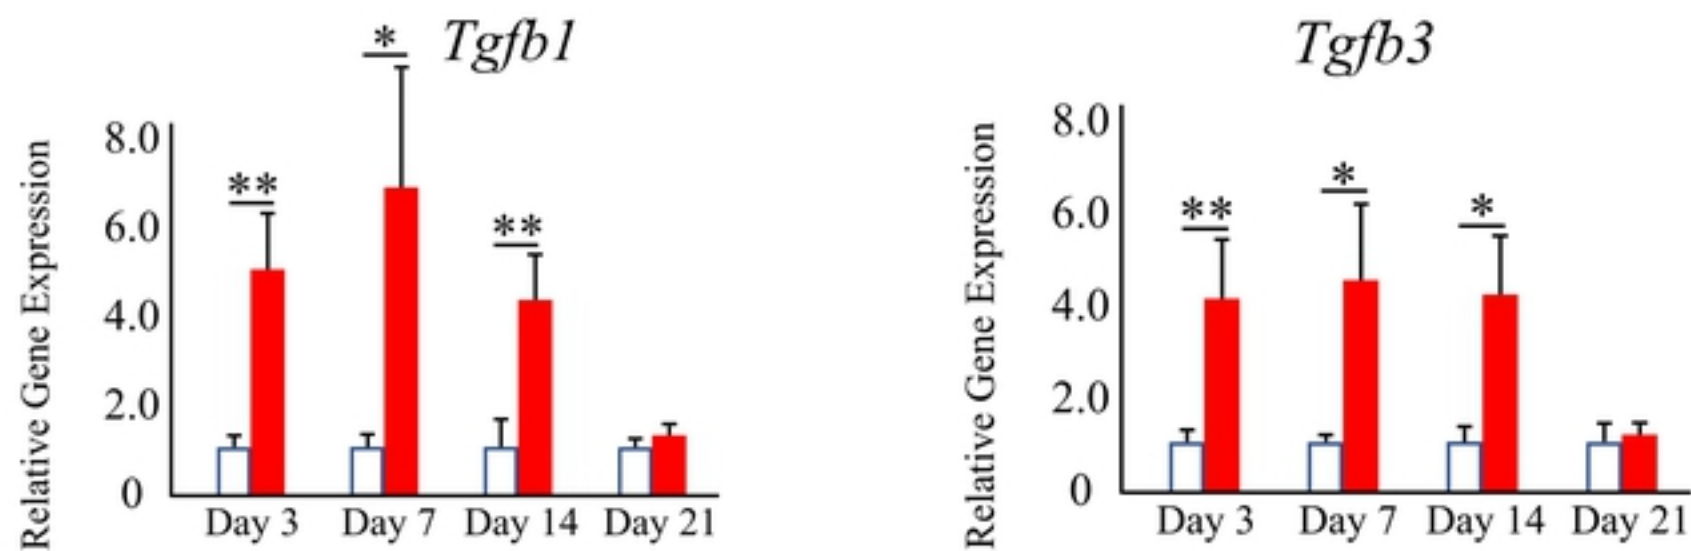

Source: https://www.biorxiv.org/content/10.1101/571968v1.full.pdf
